# Supplementary material for: Crystal engineering to control the magnetic interaction between weak ferromagnetic single-chain magnets assembled in a 3D framework
Source: Royal Society of Chemistry journal article supplement (doi:10.1039/c6cc02702d), 2016-01-01
Supplement: c6cc02702d1.pdf [file c6cc02702d1.pdf]

## Supporting Information for

# Crystal Engineering to Control the Magnetic Interaction between Weak Ferromagnetic Single-Chain Magnets Assembled in 3D Framework

Lei Su,<sup>a</sup> Wei-Chao Song,<sup>b</sup> Jiong-Peng Zhao,<sup>\*a</sup> Fu-Chen Liu<sup>\*a</sup>

<sup>a</sup> School of Chemistry and Chemical Engineering, Tianjin University of Technology, Tianjin 300384, P.R. China.

<sup>b</sup> Tianjin Key Laboratory of Structure and Performance for Functional Molecules, College of Chemistry, Tianjin Normal University, Tianjin 300387, P. R. China

\* Corresponding author. E-mail: horryzhao@yahoo.com, fuchenliutj@yahoo.com

**Table S1.** Selected bond lengths [Å] for **1** and **2**.

|                                          | <b>1</b>   | <b>2</b>    |
|------------------------------------------|------------|-------------|
| Co1—O6                                   | 1.968 (4)  | 1.9584 (19) |
| Co1—O1                                   | 2.094 (5)  | 2.074 (2)   |
| Co1—O3                                   | 2.094 (5)  | 2.076 (2)   |
| Co1—O4                                   | 2.162 (5)  | 2.113 (2)   |
| Co1—N1 <sup>i</sup>                      | 2.178 (6)  | 2.151 (3)   |
| Co1—O5                                   | 2.271 (5)  | 2.251 (2)   |
| Co2—O2                                   | 2.053 (5)  | 2.048 (2)   |
| Co2—O7 <sup>ii</sup>                     | 2.086 (5)  | 2.069 (2)   |
| Co2—O7 <sup>iii</sup>                    | 2.094 (5)  | 2.092 (2)   |
| Co2—O7                                   | 2.126 (5)  | 2.130 (2)   |
| Co2—O4                                   | 2.153 (5)  | 2.128 (2)   |
| Co2—O5                                   | 2.154 (5)  | 2.176 (2)   |
| Co1 <sup>iv</sup> —O6—Co1                | 118.4 (3)  | 116.43 (17) |
| Co2—O4—Co1                               | 101.9 (2)  | 103.28 (10) |
| Co2—O5—Co1                               | 98.4 (2)   | 97.34 (9)   |
| Co2—O7—Co2 <sup>iii</sup>                | 90.56 (19) | 90.58 (8)   |
| Co2 <sup>ii</sup> —O7—Co2 <sup>iii</sup> | 102.9 (2)  | 102.46 (10) |
| Co2 <sup>ii</sup> —O7—Co2                | 96.1 (2)   | 97.83 (9)   |

*Symmetry Code:* <sup>i</sup>  $y-1, -x+1, -z+3/2$ ; <sup>ii</sup>  $-y+3/2, -x+3/2, -z+3/2$ ; <sup>iii</sup>  $y-1/2, x+1/2, -z+3/2$ ; <sup>iv</sup>  $x, y, -z+2$

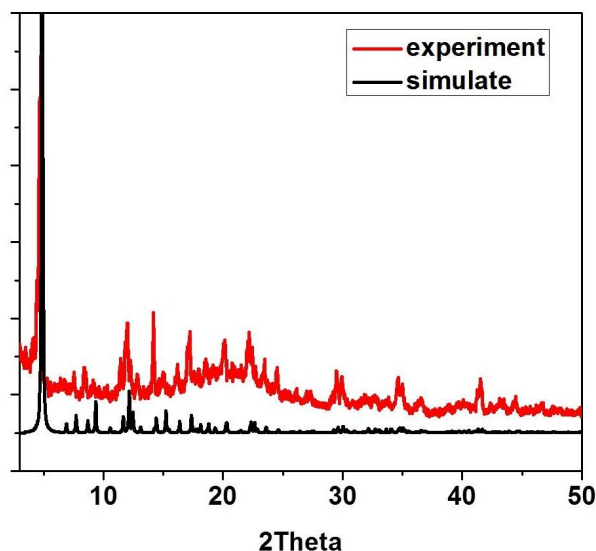

**Fig.S1** Powder X-ray diffraction pattern of **2**

## Experimental Section

**X-ray Crystallography.** The single-crystal X-ray diffraction data of **2** were collected on a Rigaku 007HF XtaLAB P200 diffractometer at 113 (2) K. The program *CrystalClear*<sup>S1</sup> was used for the integration of the diffraction profiles. The structure was solved by direct method using the SHELXS program of the SHELXTL package and refined by full-matrix least-squares methods with SHELXL (semi-empirical absorption corrections were applied by using the SADABS program).<sup>S2</sup> The non-hydrogen atoms were located in successive difference Fourier syntheses and refined with anisotropic thermal parameters on  $F^2$ . All hydrogen atoms were generated theoretically at the specific atoms and refined isotropically with fixed thermal factors. The selected bond lengths and angles are given in Tables S1.

**Magnetic measurements.** The magnetic measurements were performed by an MPMS XL-7T SQUID magnetometer with polycrystals of **2**. Diamagnetic corrections were estimated by using Pascal constants and background corrections by experimental measurement on sample holders.

## References

- S1. G. M. Sheldrick, *SHELXL97, Program for Crystal Structure Refinement*; University of Göttingen: Göttingen, Germany, 1997.
- S2. *CrystalClear and CrystalStructure*; Rigaku/MSO: The Woodlands, TX, 2005.

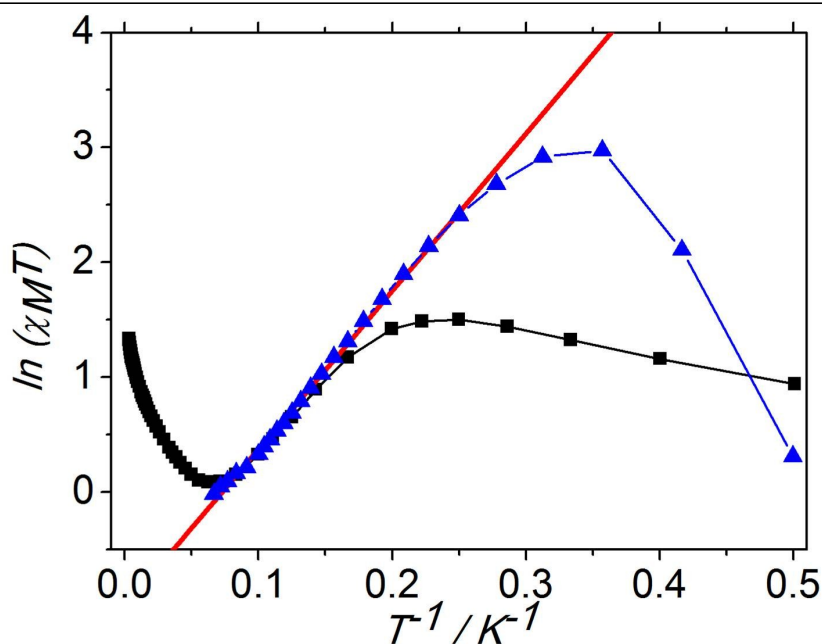

**Fig. S2** Logarithm of  $\chi_m T$  vs  $1/T$  plots (assuming one  $\text{Co}^{\text{II}}$  ions per formula unit) of **2**. The dc susceptibility (■) was collected at 0.1 T and ac susceptibility (▲) was obtained at a frequency of 100 Hz under oscillating field of 3.5 Oe. The red line is the result of fitting by  $\chi_m T = C_{\text{eff}} \exp(\Delta/k_B T)$  between 15 K and 5 K with the energy gap of  $\Delta/k_B = 13.72$  K and  $C_{\text{eff}} = 0.38 \text{ cm}^3 \text{ mol}^{-1} \text{ K}$ .

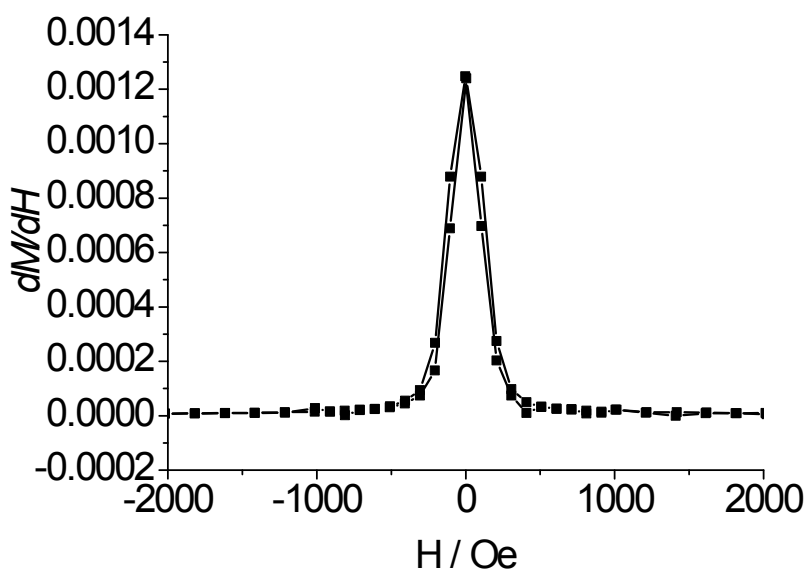

**Fig. S3** Plot of the magnetic data as  $dM/dH$  vs  $H$  for **2**.
